# Supplementary material for: Prognostic impact of urokinase-type plasminogen activator system components in clear cell renal cell carcinoma patients without distant metastasis
Source: PubMed Central journal article supplement (PMC4301943; doi:10.1186/1471-2407-14-974), 2014-12-18
Supplement: 12885_2014_5150_MOESM1_ESM.pdf [file 12885_2014_5150_MOESM1_ESM.pdf]

**Additional file 1: Table S1:** Univariate Cox's regression analysis for disease-specific survival (DSS) and overall survival (OS) of patients with ccRCC (n = 112).

| Factor                        | No. cases | Disease-specific survival |          | Overall survival         |          |
|-------------------------------|-----------|---------------------------|----------|--------------------------|----------|
|                               |           | HR (95% CI) <sup>a</sup>  | <i>P</i> | HR (95% CI) <sup>a</sup> | <i>P</i> |
| <b>Gender</b>                 |           |                           |          |                          |          |
| male                          | 65        | 1                         |          | 1                        |          |
| female                        | 47        | 1.10 (0.45-2.65)          | 0.839    | 1.81 (0.88-3.72)         | 0.109    |
| <b>Age (years)</b>            |           |                           |          |                          |          |
| ≤ 64                          | 57        | 1                         |          | 1                        |          |
| > 64                          | 55        | 2.85 (1.13-7.21)          | 0.027    | 2.82 (1.43-5.56)         | 0.003    |
| <b>Tumour stage</b>           |           |                           |          |                          |          |
| pT1+2                         | 87        | 1                         |          | 1                        |          |
| pT3+4                         | 25        | 2.50 (1.03-6.06)          | 0.042    | 1.68 (0.83-3.38)         | 0.150    |
| <b>Tumour grade</b>           |           |                           |          |                          |          |
| G1+2                          | 68        | 1                         |          | 1                        |          |
| G3+4                          | 44        | 2.65 (1.10-6.40)          | 0.030    | 2.01 (1.06-3.81)         | 0.033    |
| <b>uPA<sup>b</sup></b>        |           |                           |          |                          |          |
| low                           | 53        | 1                         |          | 1                        |          |
| high                          | 59        | 3.11 (1.21-8.04)          | 0.019    | 1.61 (0.85-3.05)         | 0.148    |
| <b>uPAR<sup>b</sup></b>       |           |                           |          |                          |          |
| low                           | 55        | 1                         |          | 1                        |          |
| high                          | 57        | 5.03 (1.69-15.0)          | 0.004    | 2.03 (1.05-3.93)         | 0.036    |
| <b>PAI-1<sup>b</sup></b>      |           |                           |          |                          |          |
| low                           | 56        | 1                         |          | 1                        |          |
| high                          | 56        | 2.88 (1.12-7.44)          | 0.029    | 1.96 (1.01-3.79)         | 0.046    |
| <b>uPA/uPAR<sup>b</sup></b>   |           |                           |          |                          |          |
| uPA and uPAR low              | 41        | 1                         |          | 1                        |          |
| uPA and/or uPAR high          | 71        | 12.6 (1.69-94.1)          | 0.013    | 1.58 (0.78-3.19)         | 0.202    |
| <b>uPA/PAI-1<sup>b</sup></b>  |           |                           |          |                          |          |
| uPA and PAI-1 low             | 43        | 1                         |          | 1                        |          |
| uPA and/or PAI-1 high         | 69        | 4.42 (1.80-11.1)          | 0.017    | 1.88 (0.93-3.79)         | 0.080    |
| <b>uPAR/PAI-1<sup>b</sup></b> |           |                           |          |                          |          |
| uPAR and PAI-1 low            | 40        | 1                         |          | 1                        |          |
| uPAR and/or PAI-1 high        | 72        | 3.80 (1.12-12.9)          | 0.032    | 1.79 (0.87-3.69)         | 0.114    |

<sup>a</sup>HR: hazard ratio; 95% CI: 95% confidence interval of univariate Cox's regression analysis

<sup>b</sup>Dichotomised into groups with high and low levels of uPA system factors in tumour tissue by the median values.

**Additional file 1: Table S2:** Univariate Cox's regression analysis for disease-specific survival (DSS) and overall survival (OS) in the subgroup of ccRCC patients with organ-confined tumours (tumour stage pT1+2, n = 87).

| Factor                        | No. cases | Disease-specific survival<br>HR (95% CI) <sup>a</sup> | <i>P</i> | Overall survival<br>HR (95% CI) <sup>a</sup> | <i>P</i> |
|-------------------------------|-----------|-------------------------------------------------------|----------|----------------------------------------------|----------|
| <b>Gender</b>                 |           |                                                       |          |                                              |          |
| male                          | 47        | 1                                                     |          | 1                                            |          |
| female                        | 40        | 0.92 (0.31-2.73)                                      | 0.874    | 1.87 (0.82-4.28)                             | 0.137    |
| <b>Age (years)</b>            |           |                                                       |          |                                              |          |
| ≤ 64                          | 48        | 1                                                     |          | 1                                            |          |
| > 64                          | 39        | 2.91 (0.92-9.18)                                      | 0.068    | 2.83 (1.29-6.21)                             | 0.009    |
| <b>Tumour grade</b>           |           |                                                       |          |                                              |          |
| G1+2                          | 58        | 1                                                     |          | 1                                            |          |
| G3+4                          | 29        | 1.68 (0.56-5.00)                                      | 0.352    | 1.56 (0.73-3.33)                             | 0.254    |
| <b>uPA<sup>b</sup></b>        |           |                                                       |          |                                              |          |
| low                           | 51        | 1                                                     |          | 1                                            |          |
| high                          | 36        | 1.86 (0.62-5.55)                                      | 0.266    | 1.15 (0.53-2.49)                             | 0.717    |
| <b>uPAR<sup>b</sup></b>       |           |                                                       |          |                                              |          |
| low                           | 49        | 1                                                     |          | 1                                            |          |
| high                          | 38        | 3.15 (0.97-10.2)                                      | 0.057    | 1.52 (0.71-3.24)                             | 0.277    |
| <b>PAI-1<sup>b</sup></b>      |           |                                                       |          |                                              |          |
| low                           | 48        | 1                                                     |          | 1                                            |          |
| high                          | 39        | 1.60 (0.54-4.77)                                      | 0.398    | 1.49 (0.70-3.18)                             | 0.299    |
| <b>uPA/uPAR<sup>b</sup></b>   |           |                                                       |          |                                              |          |
| uPA and uPAR low              | 35        | 1                                                     |          | 1                                            |          |
| uPA and/or uPAR high          | 52        | 8.80 (1.14-67.8)                                      | 0.037    | 1.30 (0.59-2.84)                             | 0.513    |
| <b>uPA/PAI-1<sup>b</sup></b>  |           |                                                       |          |                                              |          |
| uPA and PAI-1 low             | 37        | 1                                                     |          | 1                                            |          |
| uPA and/or PAI-1 high         | 50        | 2.90 (0.80-10.6)                                      | 0.106    | 1.54 (0.70-3.37)                             | 0.278    |
| <b>uPAR/PAI-1<sup>b</sup></b> |           |                                                       |          |                                              |          |
| uPAR and PAI-1 low            | 35        | 1                                                     |          | 1                                            |          |
| uPAR and/or PAI-1 high        | 52        | 2.53 (0.70-9.19)                                      | 0.159    | 1.55 (0.70-3.45)                             | 0.284    |

<sup>a</sup>HR: hazard ratio; 95% CI: 95% confidence interval of univariate Cox's regression analysis

<sup>b</sup>Dichotomised into groups with high and low levels of uPA system factors in tumour tissue by the median values.

**Additional file 1: Table S3:** Association of uPA system component levels in tumor tissue specimens with disease-specific survival (DSS) and overall survival (OS) in the subgroup of ccRCC patients with organ-confined tumours (tumour stage pT1+2, n = 87) assessed by multivariate Cox's regression analysis.

| Factor                   | No. cases | Disease-specific survival<br>HR (95% CI) <sup>a</sup> | <i>P</i> | Overall survival<br>HR (95% CI) <sup>a</sup> | <i>P</i> |
|--------------------------|-----------|-------------------------------------------------------|----------|----------------------------------------------|----------|
| <b>Gender</b>            |           |                                                       |          |                                              |          |
| male                     | 47        | 1                                                     |          | 1                                            |          |
| female                   | 40        | 0.87 (0.29-2.59)                                      | 0.796    | 1.80 (0.78-4.15)                             | 0.164    |
| <b>Age (years)</b>       |           |                                                       |          |                                              |          |
| ≤ 64                     | 48        | 1                                                     |          | 1                                            |          |
| > 64                     | 39        | 2.83 (0.89-8.92)                                      | 0.077    | 2.73 (1.23-6.10)                             | 0.014    |
| <b>Tumour grade</b>      |           |                                                       |          |                                              |          |
| G1+2                     | 58        | 1                                                     |          | 1                                            |          |
| G3+4                     | 29        | 1.56 (0.52-4.67)                                      | 0.428    | 1.34 (0.62-2.90)                             | 0.456    |
| <b>uPA<sup>b</sup></b>   |           |                                                       |          |                                              |          |
| low                      | 51        | 1                                                     |          | 1                                            |          |
| high                     | 36        | 1.69 (0.54-5.32)                                      | 0.368    | 0.88 (0.39-1.97)                             | 0.755    |
| <b>uPAR<sup>b</sup></b>  |           |                                                       |          |                                              |          |
| low                      | 49        | 1                                                     |          | 1                                            |          |
| high                     | 38        | 3.09 (0.88-10.8)                                      | 0.077    | 1.20 (0.52-2.73)                             | 0.671    |
| <b>PAI-1<sup>b</sup></b> |           |                                                       |          |                                              |          |
| low                      | 48        | 1                                                     |          | 1                                            |          |
| high                     | 39        | 1.59 (0.49-5.21)                                      | 0.441    | 1.33 (0.59-2.98)                             | 0.486    |

<sup>a</sup>HR: hazard ratio; 95% CI: 95% confidence interval of multivariate Cox's regression analysis; uPA system factors were separately added to the base model consisting of gender, age and tumour grade.

<sup>b</sup>Dichotomised into groups with high and low levels of uPA system factors in tumour tissue by the median values.
